# Supplementary material
Source: ML conference proceedings conference paper supplement (https://openreview.net/forum?id=4WgqjmYacAf)
Supplement: supplementary_material [file attachment]

---

# Supplementary Materials of Seeing Differently, Acting Similarly: Heterogeneously Observable Imitation Learning

---

Anonymous Author(s)

Affiliation

Address

email

## 1 Algorithm

2 The pseudo codes of our algorithm are illustrated in Algorithms 1 and 2.

3

## 4 Definitions

5 The core challenges of HOIL, i.e., dynamics mismatch and support mismatch, are illustrated as below.

6

7 **Definition 1** (Dynamics Mismatch). *The dynamics mismatch between the demonstrations and the initial data denotes the situation that:*

$$\frac{\rho_{\pi_E}}{\rho_{\pi_1}} = \frac{\pi_E(a|o) \sum_{t=0}^{\infty} \gamma^t \Pr(s_t = s|\pi_E)}{\pi_1(a|o) \sum_{t=0}^{\infty} \gamma^t \Pr(s_t = s|\pi_1)} \neq 1. \quad (1)$$

9

10 **Definition 2** (Support Mismatch). *The support mismatch between the demonstrations and the initial data denotes the situation that:*

$$\text{supp}(\rho_{\pi_E}) \setminus \text{supp}(\rho_{\pi_1}) = \{x \in \mathcal{S} \times \mathcal{A} | \rho_{\pi_E}(x) \neq 0\} \setminus \{x \in \mathcal{S} \times \mathcal{A} | \rho_{\pi_1}(x) \neq 0\} \neq \emptyset. \quad (2)$$

Table 1: Environmental summary of the tasks.

| Environment    | Observation Space $\mathcal{O}_E$     | Observation Space $\mathcal{O}_L$ | Expert Rewards       |
|----------------|---------------------------------------|-----------------------------------|----------------------|
| Qbert          | $84 \times 84 \times 4(\text{image})$ | 128(unsigned int)                 | $4750.00 \pm 50.51$  |
| ChopperCommand |                                       |                                   | $3135.00 \pm 145.86$ |
| Kangaroo       |                                       |                                   | $4175.00 \pm 94.21$  |
| Hopper         | 8                                     | 9                                 | $709.96 \pm 75.54$   |
| Humanoid       | 4                                     | 4                                 | $539.20 \pm 26.26$   |
| Reacher        | 5                                     | 6                                 | $-8.99 \pm 0.54$     |
| Swimmer        | 5                                     | 6                                 | $52.24 \pm 1.29$     |
| Walker2d       | 188                                   | 188                               | $929.97 \pm 24.09$   |

## 12 3 Detailed Setup for the Experiments

13 The details of the environments are reported in Table 1. Also, the detailed comparisons of the  
14 contenders (both in the main paper and the supplementary material) and IWRE are gathered in  
15 Table 2.

---

**Algorithm 1** IWRE.Pretraining

---

**Input:** Auxiliary policy  $\pi_1$ ; Expert demonstrations  $\tilde{\mathcal{T}}_{\pi_E}$ .  
**Output:** Evolving data  $\{\tilde{\mathcal{T}}_{\pi_1}, \bar{\mathcal{T}}_{\pi_1}\}$ ; Discriminator  $D_{w_1}$ ; Rejection model  $g_1$ .  
1: **function** IWRE.PRETRAINING( $\pi_1$ )  
2:     Sample the evolving data  $\{\tilde{\mathcal{T}}_{\pi_1}, \bar{\mathcal{T}}_{\pi_1}\} \sim \rho_{\pi_1}$  by  $\pi_1$ .  
3:     Train  $D_{w_1}$  and  $g_1$  by Equation (5) and (17) respectively using  $\tilde{\mathcal{T}}_{\pi_E}$  and  $\tilde{\mathcal{T}}_{\pi_1}$ .  
4:     **return**  $\bar{\mathcal{T}}_{\pi_1}, D_{w_1}, g_1$   
5: **end function**

---

---

**Algorithm 2** IWRE.Training

---

**Input:** Expert demonstrations  $\tilde{\mathcal{T}}_{\pi_E}$ ; Evolving data  $\bar{\mathcal{T}}_{\pi_1}$ ; Discriminator  $D_{w_1}$ ; Rejection model  $g_1$ .  
**Output:** Target policy  $\pi_2$ .  
1: **function** IWRE.TRAINING( $\tilde{\mathcal{T}}_{\pi_E}, \bar{\mathcal{T}}_{\pi_1}, D_{w_1}, g_1$ )  
2:     Initialize  $\pi_2, D_{w_2}$ , and  $g_2$ .  
3:     **for** each step  $t$  **do**  
4:         Sample  $\bar{\mathcal{T}}_{\pi_2} \sim \rho_{\pi_2}$  by  $\pi_2$ .  
5:         **for** each mini-batch  $\{\bar{x}_{\pi_2}\}$  and  $\{\bar{x}_{\pi_1}\}$  from  $\bar{\mathcal{T}}_{\pi_2}$  and  $\bar{\mathcal{T}}_{\pi_1}$  **do**  
6:             Update  $\pi_2$  by RL algorithms (such as PPO [4]) using instances  $\{\bar{x}_{\pi_2}\}$  and pseudo rewards  $\{-\log D_{w_2}(\bar{x}_{\pi_2})\}$ .  
7:             Update  $D_{w_2}$  by Equation (9) using negative instances  $\{\bar{x}_{\pi_2}\}$  and positive ones  $\{\bar{x}_{\pi_1}\}$ .  
8:             **if**  $\langle \mathbb{I}(D_{w_2}(\bar{x}_{\pi_2})), g_2(\bar{x}_{\pi_2}) \rangle = +1$  **then**  
9:                 Query the  $\mathcal{O}_E$  observation of  $\bar{x}_{\pi_2}$ , i.e.,  $\tilde{x}_{\pi_2}$ , through OC operation.  
10:                 Update  $D_{w_2}$  and  $g_2$  by Equation (17) using the instance  $\bar{x}_{\pi_2}$  and the corresponding label  $\langle \mathbb{I}(D_{w_1}(\tilde{x}_{\pi_2})), g_1(\tilde{x}_{\pi_2}) \rangle$ .  
11:             **end if**  
12:         **end for**  
13:     **end for**  
14:     **return**  $\pi_2$   
15: **end function**

---

16 About query strategies, for TPIL and GAMA, if the output of the domain invariant discriminator is  
17 larger than 0.5, which means the encoder fails to generate proper features to confuse its discriminator,  
18 then we would query  $\mathcal{O}_E$  of this data to update the encoder. For IWRE, the threshold of the rejection  
19 model  $g$  and the discriminator  $D_{w_2}$  was also 0.5, which means that if  $g_2(\bar{x}) > 0.5$  meanwhile  
20  $D_{w_2}(\bar{x}) > 0.5$ ,  $\mathcal{O}_E$  of this data would be queried.  $D_{w_2}$ ,  $\pi_2$ , and the encoder (for TPIL/GAMA)  
21 were pretrained for 100 epochs for all methods using evolving data during pretraining. The basic RL  
22 algorithm is PPO, and the reward signals of all methods were normalized into  $[0, 1]$  to enhance the  
23 performance of RL [2]. The buffer size for TPIL and IWRE was set as 5000. Each time the buffer is  
24 full, the encoder and the rejection model will be updated for 4 epochs; also LBC will update  $\pi_2$  for  
25 100 epochs with batch size 256 using the cross-entropy loss for Atari and the mean-square loss for  
26 MuJoCo. We set all hyper-parameters, update frequency, and network architectures of the policy part  
27 were the same as Dhariwal et al. [2]. Besides, the hyper-parameters of the discriminator for all methods  
28 were the same: The rejection model and discriminator were updated using Adam with a decayed  
29 learning rate of  $3 \times 10^{-4}$ ; the batch size was 256. The ratio of update frequency between the learner  
30 and discriminator was 3: 1. The target coverage  $c$  in Equation (17) was set as 0.8.  $\lambda$  in Equation (17)  
31 was 1.0.

## 32 4 RL Performance under the Divisions of MuJoCo

33 Here we report the performance under the division of  $\mathcal{O}_E$  and  $\mathcal{O}_L$  in MuJoCo. The details of the  
34 division are reported in Table 3. We use DDPG-based [3] agent with  $10^7$  training steps and repeat 10  
35 times with different random seeds. The results are shown in Figure 1. We can see that the agent can  
36 obtain comparable performance under  $\mathcal{O}_E$  and  $\mathcal{O}_L$ . So for MuJoCo environments, the fairness of the  
37 division in HOIL can be guaranteed, and  $\mathcal{O}_E$  is not more or less privileged than  $\mathcal{O}_L$ .

Table 2: Comparisons between all contenders and IWRE in HOIL.

| Algorithm | Considering heterogeneous observations | Being able to query | Not requiring $\mathcal{O}_E$ all along |
|-----------|----------------------------------------|---------------------|-----------------------------------------|
| GAIL      | ✗                                      | ✗                   | ✓                                       |
| GAIL-Rand | ✗                                      | ✓                   | ✓                                       |
| IW        | ✗                                      | ✗                   | ✓                                       |
| IW-Rand   | ✗                                      | ✓                   | ✓                                       |
| TPIL      | ✗                                      | ✓                   | ✓                                       |
| GAMA      | ✗                                      | ✓                   | ✓                                       |
| BC        | ✗                                      | ✗                   | ✓                                       |
| LBC       | ✓                                      | ✓                   | ✗                                       |
| PPO-RAM   | ✗                                      | ✗                   | ✓                                       |
| IWRE      | ✓                                      | ✓                   | ✓                                       |

Table 3: The observation division into  $\mathcal{O}_E$  and  $\mathcal{O}_L$  in MuJoCo. The numbers denote the randomly selected observation indexes in the corresponding MuJoCo environment on OpenAI Gym [1] platform.

|          | $\mathcal{O}_E$                                                                                                                                                                                                                                                                                                                                                                                                                                                                                                                                                                                                                                                                                                                                                                                                                                                                                                      | $\mathcal{O}_L$                                                                                                                                                                                                                                                                                                                                                                                                                                                                                                                                                                                                                                                                                                                                                                                                                                                                                                        |
|----------|----------------------------------------------------------------------------------------------------------------------------------------------------------------------------------------------------------------------------------------------------------------------------------------------------------------------------------------------------------------------------------------------------------------------------------------------------------------------------------------------------------------------------------------------------------------------------------------------------------------------------------------------------------------------------------------------------------------------------------------------------------------------------------------------------------------------------------------------------------------------------------------------------------------------|------------------------------------------------------------------------------------------------------------------------------------------------------------------------------------------------------------------------------------------------------------------------------------------------------------------------------------------------------------------------------------------------------------------------------------------------------------------------------------------------------------------------------------------------------------------------------------------------------------------------------------------------------------------------------------------------------------------------------------------------------------------------------------------------------------------------------------------------------------------------------------------------------------------------|
| Walker2d | [5, 7, 8, 10, 11, 14, 15, 16]                                                                                                                                                                                                                                                                                                                                                                                                                                                                                                                                                                                                                                                                                                                                                                                                                                                                                        | [0, 1, 2, 3, 4, 6, 9, 12, 13]                                                                                                                                                                                                                                                                                                                                                                                                                                                                                                                                                                                                                                                                                                                                                                                                                                                                                          |
| Swimmer  | [0, 3, 6, 7]                                                                                                                                                                                                                                                                                                                                                                                                                                                                                                                                                                                                                                                                                                                                                                                                                                                                                                         | [1, 2, 4, 5]                                                                                                                                                                                                                                                                                                                                                                                                                                                                                                                                                                                                                                                                                                                                                                                                                                                                                                           |
| Reacher  | [0, 1, 7, 8, 10]                                                                                                                                                                                                                                                                                                                                                                                                                                                                                                                                                                                                                                                                                                                                                                                                                                                                                                     | [2, 3, 4, 5, 6, 9]                                                                                                                                                                                                                                                                                                                                                                                                                                                                                                                                                                                                                                                                                                                                                                                                                                                                                                     |
| Hopper   | [1, 3, 6, 7, 9, 10]                                                                                                                                                                                                                                                                                                                                                                                                                                                                                                                                                                                                                                                                                                                                                                                                                                                                                                  | [0, 2, 4, 5, 8]                                                                                                                                                                                                                                                                                                                                                                                                                                                                                                                                                                                                                                                                                                                                                                                                                                                                                                        |
| Humanoid | [2, 3, 5, 6, 7, 10, 11, 12, 13, 16, 18, 19, 22, 23, 25, 29, 31, 32, 34, 36, 37, 40, 43, 44, 45, 47, 48, 49, 51, 54, 56, 57, 61, 63, 65, 66, 67, 68, 77, 78, 82, 86, 87, 89, 90, 93, 94, 95, 97, 98, 99, 102, 103, 108, 110, 112, 113, 117, 119, 120, 121, 122, 123, 124, 126, 127, 128, 133, 135, 144, 146, 147, 148, 151, 152, 153, 158, 160, 161, 162, 166, 167, 170, 171, 173, 174, 176, 177, 178, 180, 181, 184, 185, 187, 188, 191, 194, 198, 199, 200, 201, 202, 207, 208, 209, 210, 211, 212, 214, 215, 219, 223, 227, 228, 229, 231, 232, 233, 234, 236, 237, 238, 242, 244, 246, 248, 251, 253, 257, 258, 259, 260, 262, 264, 265, 267, 268, 271, 272, 273, 275, 278, 279, 280, 281, 285, 287, 289, 290, 291, 293, 294, 296, 299, 302, 304, 305, 306, 307, 308, 311, 312, 313, 315, 316, 319, 322, 326, 328, 329, 332, 337, 342, 343, 344, 345, 349, 358, 361, 362, 364, 365, 366, 368, 370, 372, 373, 375] | [0, 1, 4, 8, 9, 14, 15, 17, 20, 21, 24, 26, 27, 28, 30, 33, 35, 38, 39, 41, 42, 46, 50, 52, 53, 55, 58, 59, 60, 62, 64, 69, 70, 71, 72, 73, 74, 75, 76, 79, 80, 81, 83, 84, 85, 88, 91, 92, 96, 100, 101, 104, 105, 106, 107, 109, 111, 114, 115, 116, 118, 125, 129, 130, 131, 132, 134, 136, 137, 138, 139, 140, 141, 142, 143, 145, 149, 150, 154, 155, 156, 157, 159, 163, 164, 165, 168, 169, 172, 175, 179, 182, 183, 186, 189, 190, 192, 193, 195, 196, 197, 203, 204, 205, 206, 213, 216, 217, 218, 220, 221, 222, 224, 225, 226, 230, 235, 239, 240, 241, 243, 245, 247, 249, 250, 252, 254, 255, 256, 261, 263, 266, 269, 270, 274, 276, 277, 282, 283, 284, 286, 288, 292, 295, 297, 298, 300, 301, 303, 309, 310, 314, 317, 318, 320, 321, 323, 324, 325, 327, 330, 331, 333, 334, 335, 336, 338, 339, 340, 341, 346, 347, 348, 350, 351, 352, 353, 354, 355, 356, 357, 359, 360, 363, 367, 369, 371, 374] |

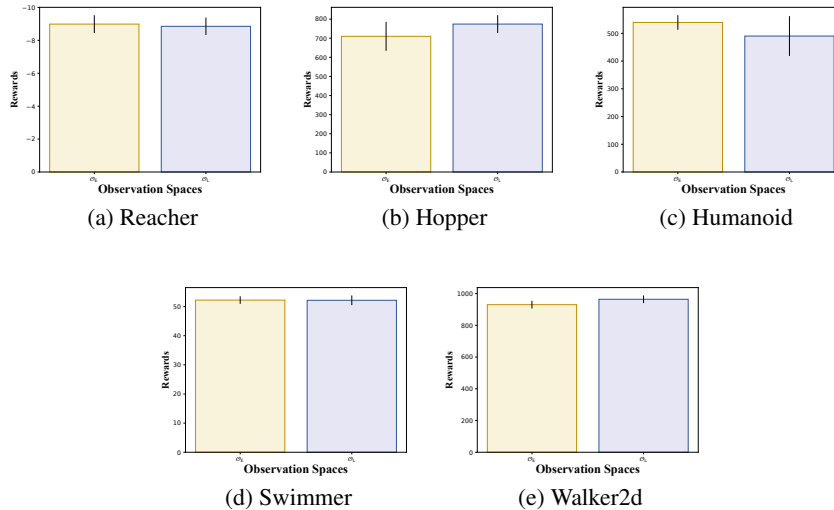

Figure 1: The performance of RL methods under the division of  $\mathcal{O}_E$  and  $\mathcal{O}_L$  in MuJoCo. The agent can obtain comparable performances under  $\mathcal{O}_E$  and  $\mathcal{O}_L$ , so that we can make sure the fairness of the experiment of HOIL in the main paper.

### 39 5 Estimation of $H$ , $O$ , and $N$ by $\mathbb{I}[D_{w_2}]g_2$

40 To investigate the ability of IWRE to distinguish the areas of latent demonstrations  $H$ , observed  
 41 demonstrations  $O$ , and non-expert data  $N$  during policy learning, we recorded the accuracy and  
 42 estimated percentage of each area on *Hopper* and *Walker2d*. The calculations of each curve are  
 43 shown as below:

$$44 \text{ Accuracy}_H = \frac{\sum_{i=1}^m \{\mathbb{I}[D_{w_1}(\tilde{x}_i)]g_1(\tilde{x}_i) == 1 \& \& \mathbb{I}[D_{w_2}(\bar{x}_i)]g_2(\bar{x}_i) == 1\}}{\sum_{i=1}^m \{\mathbb{I}[D_{w_1}(\tilde{x}_i)]g_1(\tilde{x}_i) == 1\}}, \quad (3)$$

$$45 \text{ Accuracy}_O = \frac{\sum_{i=1}^m \{\mathbb{I}[D_{w_1}(\tilde{x}_i)]g_1(\tilde{x}_i) == 0 \& \& \mathbb{I}[D_{w_2}(\bar{x}_i)]g_2(\bar{x}_i) == 0\}}{\sum_{i=1}^m \{\mathbb{I}[D_{w_1}(\tilde{x}_i)]g_1(\tilde{x}_i) == 0\}}, \quad (4)$$

$$46 \text{ Accuracy}_N = \frac{\sum_{i=1}^m \{\mathbb{I}[D_{w_1}(\tilde{x}_i)]g_1(\tilde{x}_i) == -1 \& \& \mathbb{I}[D_{w_2}(\bar{x}_i)]g_2(\bar{x}_i) == -1\}}{\sum_{i=1}^m \{\mathbb{I}[D_{w_1}(\tilde{x}_i)]g_1(\tilde{x}_i) == -1\}}, \quad (5)$$

$$47 \text{ Percentage}_H = \frac{\sum_{i=1}^m \{\mathbb{I}[D_{w_1}(\tilde{x}_i)]g_1(\tilde{x}_i) == 1\}}{m}, \quad (6)$$

$$48 \text{ Percentage}_O = \frac{\sum_{i=1}^m \{\mathbb{I}[D_{w_1}(\tilde{x}_i)]g_1(\tilde{x}_i) == 0\}}{m}, \quad (7)$$

$$\text{Percentage}_N = \frac{\sum_{i=1}^m \{\mathbb{I}[D_{w_1}(\tilde{x}_i)]g_1(\tilde{x}_i) == -1\}}{m}, \quad (8)$$

49 in which  $\{\bar{x}_i, \tilde{x}_i\} \sim \rho_{\pi_2}$  denotes a batch of data sampled by  $\pi_2$ . The results are shown in Figure 2.  
 50 The results depicted not only the accuracies of  $\mathbb{I}[D_{w_2}]g_2$ , but also the changes of these three areas  
 51 during the policy learning. We can see that the accuracies in each area and the percentage of  $O$  will  
 52 decrease at first. While at the same time, the percentage of  $H$  will increase. This is because the  
 53 successful detection of  $H$  will decrease the estimated percentage of  $O$  and reduce the accuracy of  
 54  $\mathbb{I}[D_{w_2}]g_2$ . With the help of query operations, the accuracy of  $\mathbb{I}[D_{w_2}]g_2$  will gradually increase. Also,  
 55 followed by the learning procedure of the policy  $\pi_2$ , more and more  $H$  will be recognized as  $O$ , with  
 56 less and less  $N$ . This is why in the following period, the percentages of  $H$  and  $N$  will decrease while  
 57 that of  $O$  will increase. These results also verify that our algorithm IWRE can indeed detect  $H$ ,  $O$ ,  
 58 and  $N$  successfully as the learning process of the policy.

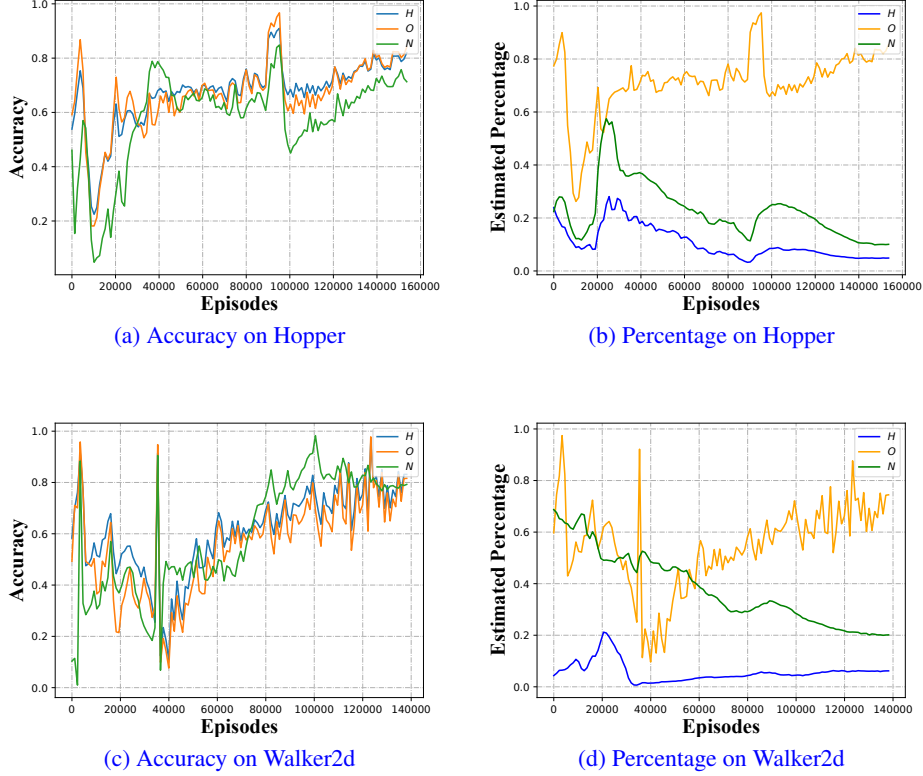

Figure 2: The accuracy and percentage of  $H$ ,  $O$ , and  $N$  calculated by  $\mathbb{I}[D_{w_1}(\tilde{x}_i)]g_1(\tilde{x}_i)$  and  $\mathbb{I}[D_{w_2}(\tilde{x}_i)]g_2(\tilde{x}_i)$  during policy learning.

## 59 6 Query Efficiency

60 We also investigate whether our query strategy is efficient. To this end, we allocate the query budget,  
 61 i.e., limiting the query ratio for each method. For TPIL, it preferentially queries those data with low  
 62  $D_{w_\phi}$  output; for our method IWRE, it preferentially queries those data with high  $\langle D_{w_2}, g_2 \rangle$  output.  
 63 Besides, since GAIL and IW cannot directly perform queries, we design a random-selection strategy  
 64 for them as GAIL-Rand and IW-Rand: for each batch of data, we randomly select data and input the  
 65  $\mathcal{O}_E$  observations of these data to  $D_{w_1}$ . If  $D_{w_1}(\tilde{x}) > 0.5$ , which means  $D_{w_1}$  regard this data being  
 66 belonging to the expert demonstrations, then we would label this data as the expert data to update  
 67  $D_{w_2}$ . The results are depicted in Figure 3.

68 We can observe that the random strategy does not always improve the performance of GAIL and  
 69 IW. For GAIL-Rand, without importance-weighting to calibrate the learning process of the reward  
 70 function, its performance become even worse on *Hopper*, *Swimmer*, and *Walker2d*, because the  
 71 queried information enhances the discrimination ability of reward function, making it even more  
 72 impossible for the agent to obtain effective feedbacks; for IW-Rand, its performance is better than  
 73 GAIL-Rand on most environments, and is reinforced on *Hopper*, *Reacher*, and *Walker2d*, which  
 74 further demonstrate that the query operation is indeed necessary for HOIL problem, but still fails  
 75 compared with our method; for TPIL, it is comparable with IW-Rand, however, its performance  
 76 improvement is very limited as the budget increases, and on *Swimmer* and *Walker2d* there even exist  
 77 performance degradations, which suggests that its query strategy is very unstable; for GAMA, it has a  
 78 good start point, but the performance gain is very limited while the budget increases; for our method,  
 79 its performance is almost the same as that of IW-Rand without query on most environments. When it  
 80 is allowed to query  $\mathcal{O}_E$  observation, our method outperforms other methods with a large gap, which  
 81 shows that the query strategy of our method is indeed more efficient.

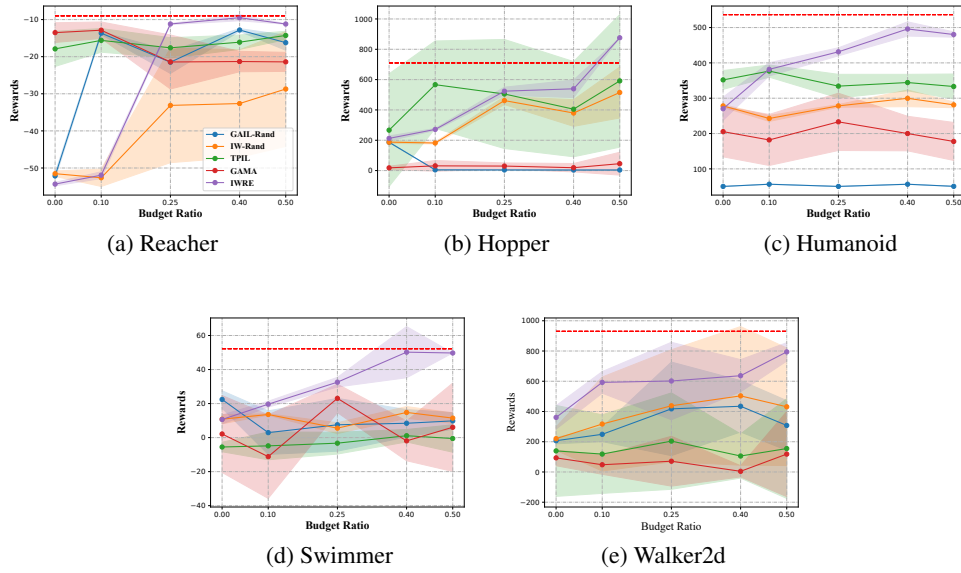

Figure 3: The final rewards of each method on MuJoCo with different budget ratios, where the shaded regions indicate the standard deviation. The red horizontal dotted line represents the averaged performance of the expert.

## 82 7 Imitation with Different Number of Expert Trajectories

83 The performances of different numbers of expert trajectories of all contenders are reported in Figure 4.  
 84 Each experiment is conducted 5 trials with different random seeds. We can observe that even with a  
 85 very limited number of trajectories, our algorithm achieves better performance than other algorithms  
 in most environments.

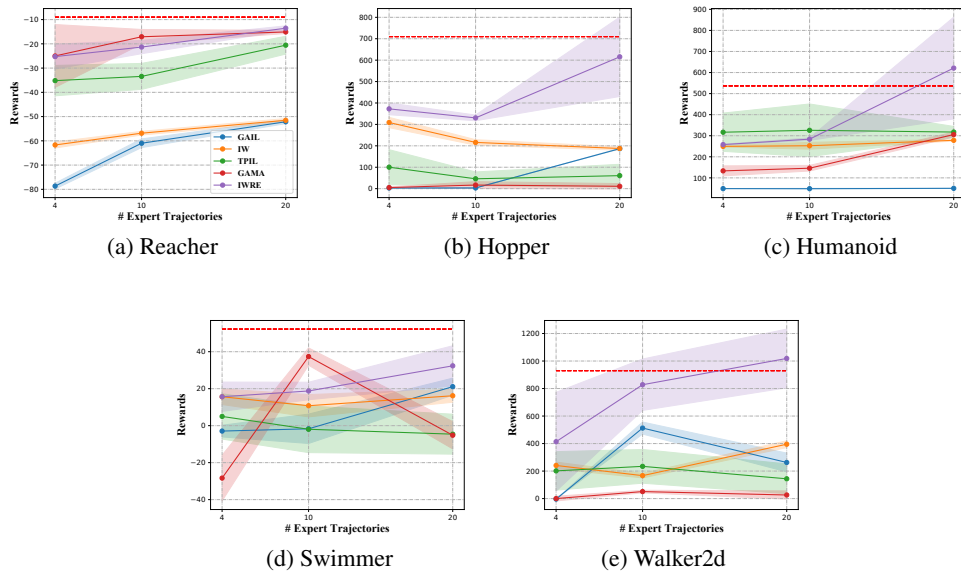

Figure 4: The learning curves of each method in MuJoCo environments with different number of expert trajectories, where the shaded region indicates the standard deviation.

87 **8 Notations**

88 The notations of the main paper are gathered in Table 4.

Table 4: The notations of the main paper.

| Notation                      | Meaning                                                                              |
|-------------------------------|--------------------------------------------------------------------------------------|
| $\mathcal{S}$                 | State space                                                                          |
| $\mathcal{A}$                 | Action space                                                                         |
| $\mathcal{O}$                 | Observation space                                                                    |
| $\mathcal{O}_E$               | Observation space of the expert’s view                                               |
| $\mathcal{O}_L$               | Observation space of the learner’s view                                              |
| $\mathcal{P}$                 | Transition Probability                                                               |
| $\gamma$                      | Discounted factor                                                                    |
| $\pi_E$                       | Expert policy under $\mathcal{O}_E$                                                  |
| $\pi_1$                       | Auxiliary policy under $\mathcal{O}_E$                                               |
| $\pi_2$                       | Target policy under $\mathcal{O}_L$                                                  |
| $f_E$                         | Mapping function $\mathcal{S} \rightarrow \mathcal{O}_E$                             |
| $f_L$                         | Mapping function $\mathcal{S} \rightarrow \mathcal{O}_L$                             |
| $\tilde{\mathcal{T}}_{\pi_E}$ | Trajectory sampled by $\pi_E$ under $\mathcal{O}_E$ (demonstrations)                 |
| $\tilde{\mathcal{T}}_{\pi_1}$ | Trajectory sampled by $\pi_1$ under $\mathcal{O}_E$                                  |
| $\tilde{\mathcal{T}}_{\pi_2}$ | Trajectory sampled by $\pi_2$ under $\mathcal{O}_E$                                  |
| $\bar{\mathcal{T}}_{\pi_1}$   | Trajectory sampled by $\pi_1$ under $\mathcal{O}_L$                                  |
| $\bar{\mathcal{T}}_{\pi_2}$   | Trajectory sampled by $\pi_2$ under $\mathcal{O}_L$                                  |
| $x$                           | An instance of state-action pair                                                     |
| $\tilde{x}$                   | An instance of observation-action pair under $\mathcal{O}_E$                         |
| $\bar{x}$                     | An instance of observation-action pair under $\mathcal{O}_L$                         |
| $\rho_{\pi_E}$                | Occupancy measure of the expert policy $\pi_E$                                       |
| $\rho_{\pi_1}$                | Occupancy measure of the auxiliary policy $\pi_1$                                    |
| $\rho_{\pi_2}$                | Occupancy measure of the target policy $\pi_2$                                       |
| $D_{w_1}$                     | Adversarial model on $\tilde{\mathcal{T}}_{\pi_E}$ and $\tilde{\mathcal{T}}_{\pi_1}$ |
| $D_{w_2}$                     | Adversarial model on $\bar{\mathcal{T}}_{\pi_1}$ and $\bar{\mathcal{T}}_{\pi_2}$     |
| $\alpha$                      | Importance-weighting factor                                                          |
| $H$                           | Latent demonstration                                                                 |
| $O$                           | Observed demonstration                                                               |
| $N$                           | Non-expert data                                                                      |
| $g_1$                         | rejection model under $\mathcal{O}_E$                                                |
| $g_2$                         | rejection model under $\mathcal{O}_L$                                                |

89 **9 Broader Impacts**

90 In this work, we introduce the Heterogeneously Observable Imitation Learning (HOIL) framework  
 91 and propose the IWRE approach to solve the HOIL problem. Meanwhile, as collecting heterogeneous  
 92 demonstrations is much more convenient than gathering homogeneous ones, this work could lead  
 93 to potential risks of abusing unauthorized data. While we believe that developing these techniques  
 94 is still necessary for the importance of solving imitation learning under heterogeneous observation  
 95 spaces. On the other hand, there have been many techniques for preserving data privacy, which can  
 96 be compatible with our approach to avoid such problems.

97 **References**

- 98 [1] Greg Brockman, Vicki Cheung, Ludwig Pettersson, Jonas Schneider, John Schulman, Jie Tang,  
99 and Wojciech Zaremba. Openai gym. *CoRR*, abs/1606.01540, 2016.
- 100 [2] Prafulla Dhariwal, Christopher Hesse, Oleg Klimov, Alex Nichol, Matthias Plappert, Alec  
101 Radford, John Schulman, Szymon Sidor, Yuhuai Wu, and Peter Zhokhov. Openai baselines,  
102 2017.
- 103 [3] Timothy P. Lillicrap, Jonathan J. Hunt, Alexander Pritzel, Nicolas Heess, Tom Erez, Yuval Tassa,  
104 David Silver, and Daan Wierstra. Continuous control with deep reinforcement learning. In Yoshua  
105 Bengio and Yann LeCun, editors, *4th International Conference on Learning Representations*,  
106 *ICLR 2016, San Juan, Puerto Rico, May 2-4, 2016, Conference Track Proceedings*, 2016.
- 107 [4] John Schulman, Filip Wolski, Prafulla Dhariwal, Alec Radford, and Oleg Klimov. Proximal  
108 policy optimization algorithms. *CoRR*, abs/1707.06347, 2017.
